# Supplementary material
Source: Springer Nature journal article supplement (https://www.springermedizin.de/resource/supplementary/12872_2010_301_MOESM6_ESM.pdf/9429652)

| Author             | Follow-up (months) | Events (n/N) (risk) |                 |
|--------------------|--------------------|---------------------|-----------------|
|                    |                    | Intervention        | Control         |
| Borchgrevink(1966) | 10                 | 10/100 (0.1)        | 14/100 (0.14)   |
| Dehmer(1988)       | 9                  | 0/46 (0)            | 0/44 (0)        |
| Grigg(1989)        | 3.3                | 2/52 (0.04)         | 0/56 (0)        |
| Nye(1990)          | 11                 | 0/36 (0)            | 0/37 (0)        |
| Bairati(1992)      | 6                  | 0/107 (0)           | 0/98 (0)        |
| Franzen(1993)      | 4                  | 1/103 (0.01)        | 2/101 (0.02)    |
| Leaf(1994)         | 6                  | 0/275 (0)           | 2/276 (0.01)    |
| Cairns(1996)       | 4.2                | 3/325 (0.01)        | 1/328 (0)       |
| Eritsland(1996)    | 12                 | 8/317 (0.03)        | 6/293 (0.02)    |
| Rossing(1996)      | 12                 | 0/18 (0)            | 0/18 (0)        |
| Johansen(1999)     | 6                  | 1/250 (0)           | 3/250 (0.01)    |
| Durrington(2001)   | 6                  | 0/30 (0)            | 1/29 (0.03)     |
| Maresta(2002)      | 3                  | 1/169 (0.01)        | 0/170 (0)       |
| Calò(2005)         | 1                  | 1/79 (0.01)         | 2/81 (0.02)     |
| Leaf(2005)         | 12                 | 13/200 (0.06)       | 12/202 (0.06)   |
| Brouwer(2006)      | 12                 | 8/273 (0.03)        | 14/273 (0.05)   |
| OMEGA-Trial(2009)  | 12                 | 88/1919 (0.05)      | 70/1885 (0.04)  |
| <b>Overall</b>     |                    | <b>136/4281</b>     | <b>127/4223</b> |

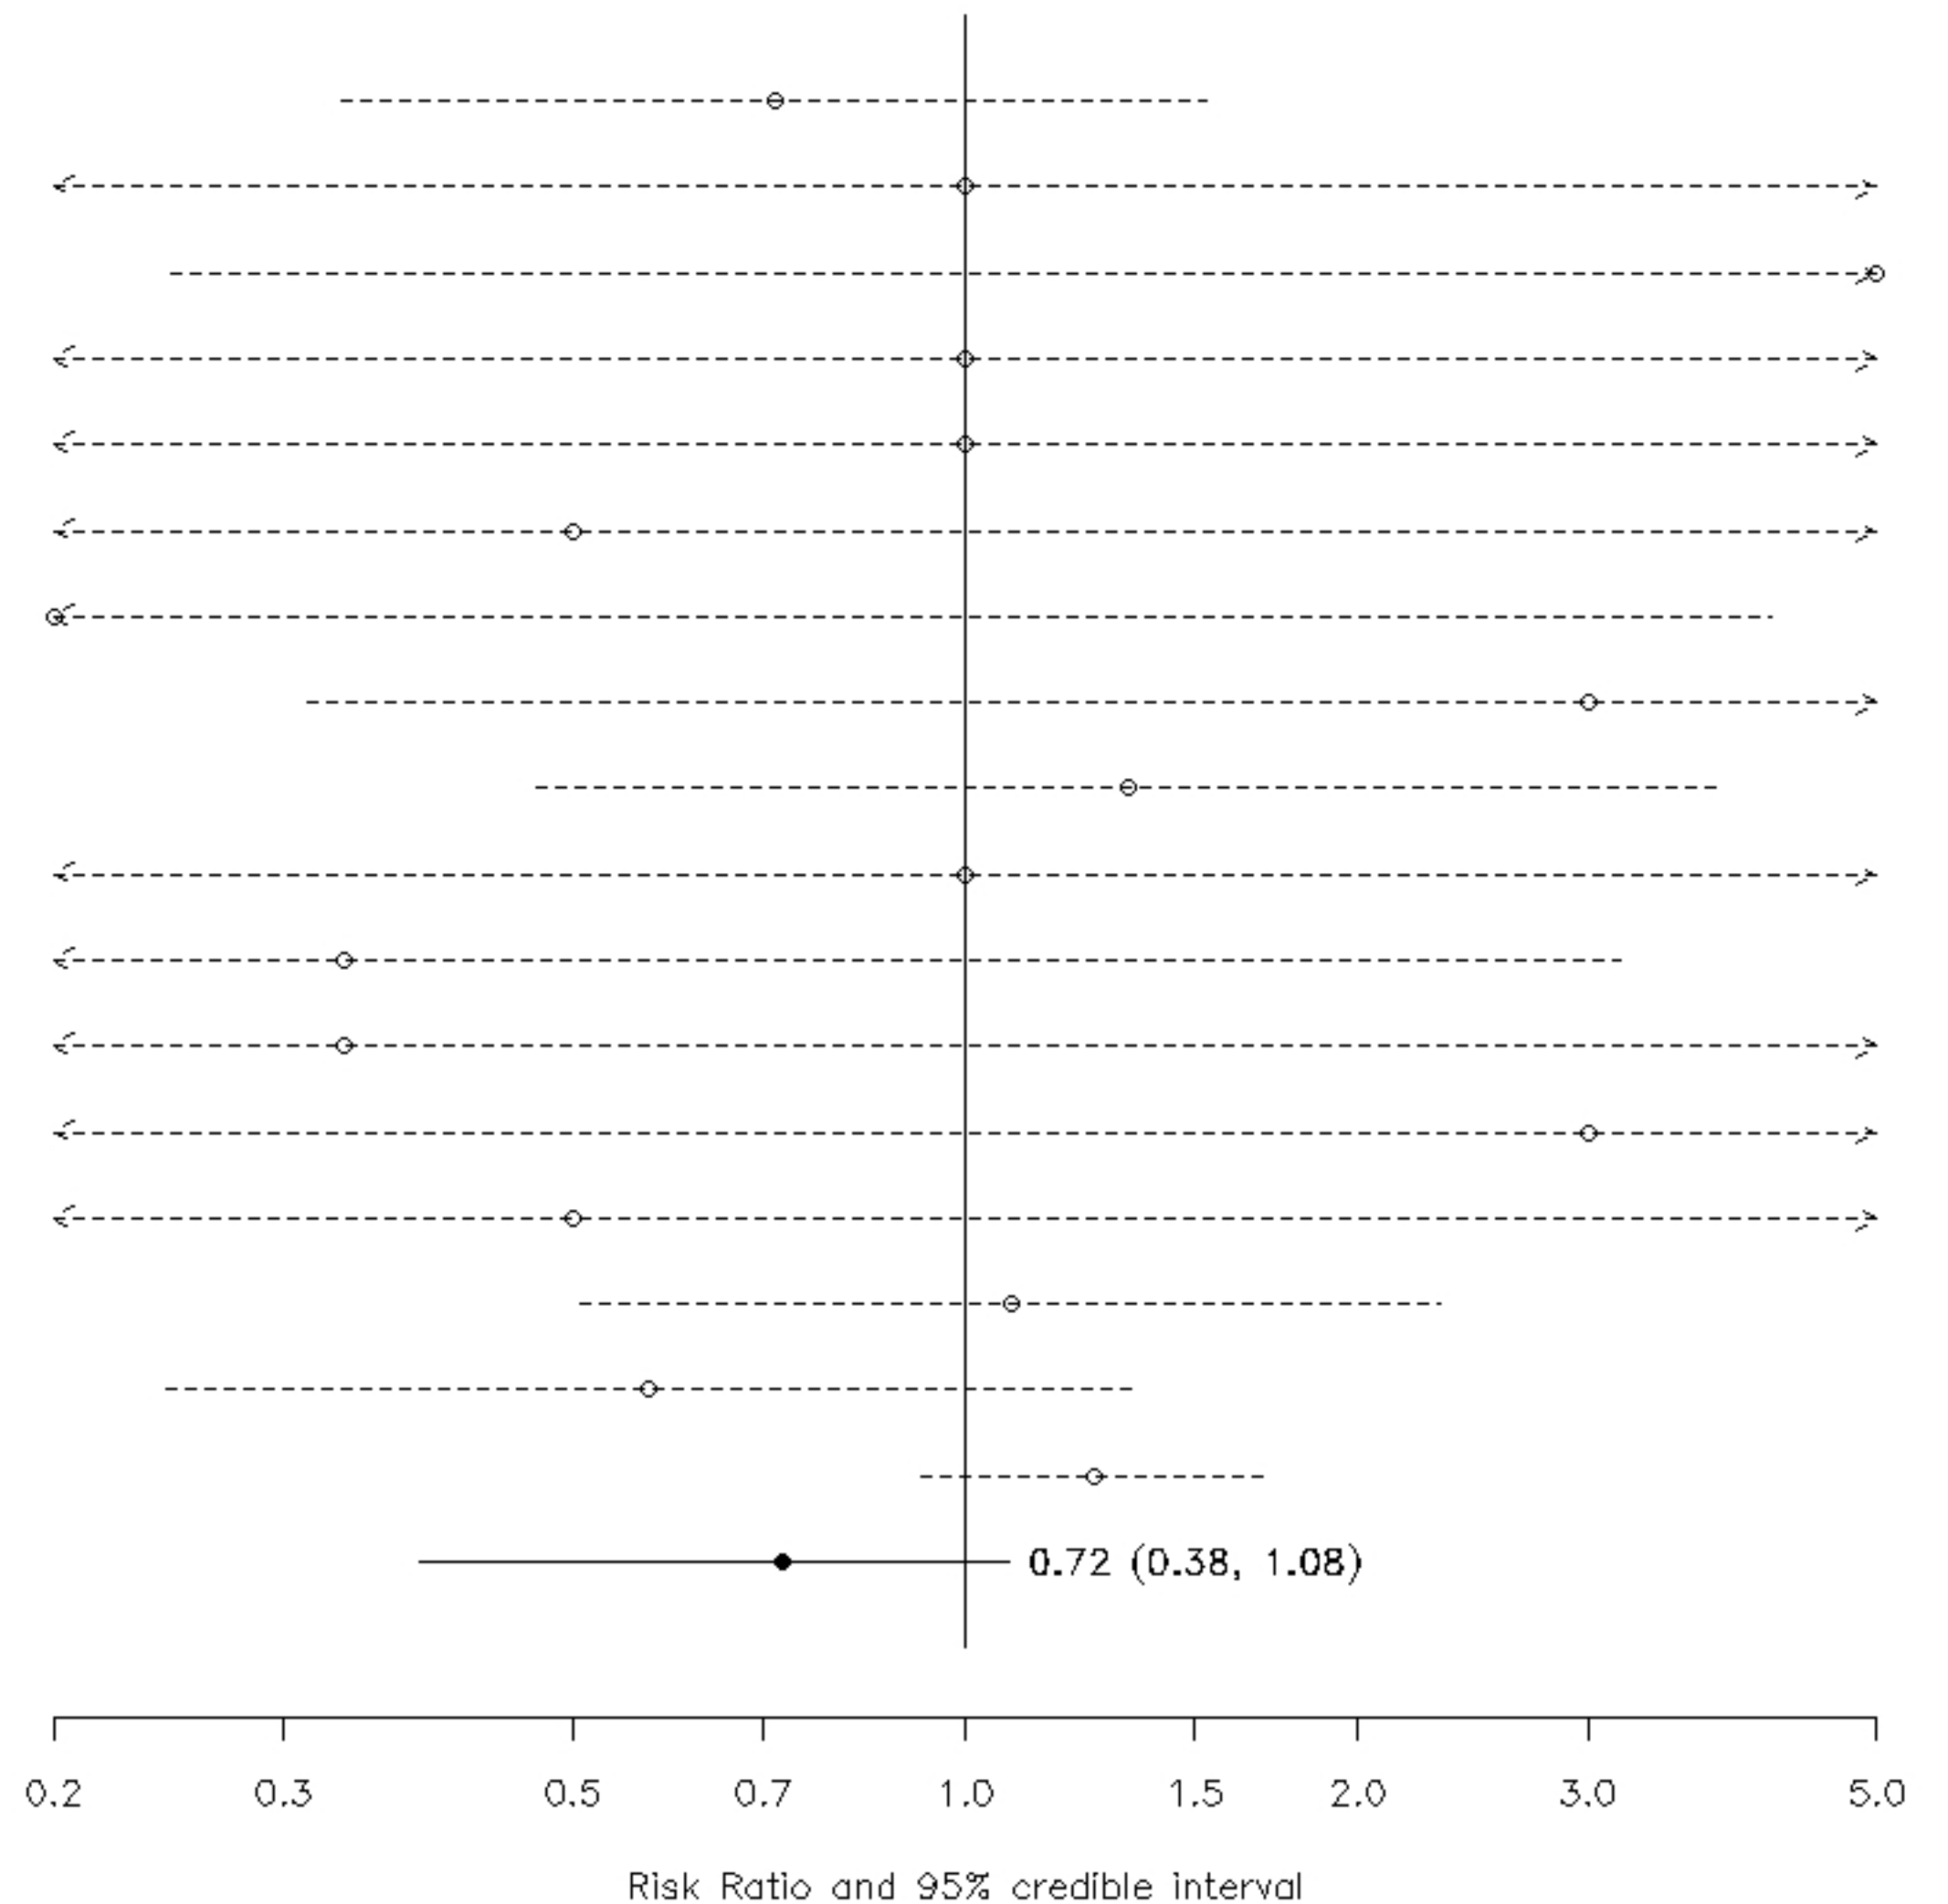

Supplement: MOESM6 [file 9429652]
